# Supplementary material
Source: publisher figshare collection journal article supplement (https://wiley.figshare.com/ndownloader/files/33832844)
Supplement: Supplementary file 1 [file 33832844]

## Sheet: Toxicity Data - Used in Analysi
Chemical	Concentration	Replicate	Survival
CONTROL	0	1	100
CONTROL	0	2	90
CONTROL	0	3	100
CONTROL	0	4	100
FLUB	50.8975	1	80
FLUB	50.8975	2	90
FLUB	50.8975	3	80
FLUB	50.8975	4	100
FLUB	79.8474	1	70
FLUB	79.8474	2	60
FLUB	79.8474	3	70
FLUB	79.8474	4	80
FLUB	85.3803	1	60
FLUB	85.3803	2	40
FLUB	85.3803	3	50
FLUB	85.3803	4	40
FLUB	122.551	1	30
FLUB	122.551	2	40
FLUB	122.551	3	30
FLUB	122.551	4	30
FLUB	174.62	1	10
FLUB	174.62	2	0
FLUB	174.62	3	0
FLUB	174.62	4	0
FLUP	6.38044	1	100
FLUP	6.38044	2	90
FLUP	6.38044	3	100
FLUP	6.38044	4	100
FLUP	8.67179	1	100
FLUP	8.67179	2	90
FLUP	8.67179	3	100
FLUP	8.67179	4	90
FLUP	11.8933	1	100
FLUP	11.8933	2	100
FLUP	11.8933	3	70
FLUP	11.8933	4	80
FLUP	14.9666	1	60
FLUP	14.9666	2	80
FLUP	14.9666	3	70
FLUP	14.9666	4	70
FLUP	25.8035	1	0
FLUP	25.8035	2	0
FLUP	25.8035	3	0
FLUP	25.8035	4	0
SULF	57.3999	1	90
SULF	57.3999	2	100
SULF	57.3999	3	80
SULF	57.3999	4	100
SULF	103.844	1	80
SULF	103.844	2	90
SULF	103.844	3	90
SULF	103.844	4	80
SULF	162.737	1	70
SULF	162.737	2	50
SULF	162.737	3	60
SULF	162.737	4	50
SULF	207.841	1	0
SULF	207.841	2	0
SULF	207.841	3	0
SULF	207.841	4	0
SULF	260.474	1	0
SULF	260.474	2	0
SULF	260.474	3	0
SULF	260.474	4	0
CHLOR	3.44964	1	100
CHLOR	3.44964	2	90
CHLOR	3.44964	3	90
CHLOR	3.44964	4	90
CHLOR	3.79868	1	60
CHLOR	3.79868	2	60
CHLOR	3.79868	3	50
CHLOR	3.79868	4	60
CHLOR	4.25793	1	40
CHLOR	4.25793	2	50
CHLOR	4.25793	3	30
CHLOR	4.25793	4	40
CHLOR	5.69473	1	20
CHLOR	5.69473	2	0
CHLOR	5.69473	3	0
CHLOR	5.69473	4	0
CHLOR	7.03562	1	0
CHLOR	7.03562	2	0
CHLOR	7.03562	3	0
CHLOR	7.03562	4	0
IMI	0	1	100
IMI	0	2	90
IMI	0	3	100
IMI	0	4	100
IMI	5.72975	1	70
IMI	5.72975	2	80
IMI	5.72975	3	80
IMI	5.72975	4	60
IMI	7.58	1	60
IMI	7.58	2	50
IMI	7.58	3	40
IMI	7.58	4	40
IMI	10.71	1	20
IMI	10.71	2	30
IMI	10.71	3	10
IMI	10.71	4	10
IMI	25.87	1	0
IMI	25.87	2	0
IMI	25.87	3	0
IMI	25.87	4	0
IMI	24.89	1	0
IMI	24.89	2	0
IMI	24.89	3	0
IMI	24.89	4	0
CYAN	0	1	100
CYAN	0	2	90
CYAN	0	3	100
CYAN	0	4	100
CYAN	4.69894	1	40
CYAN	4.69894	2	60
CYAN	4.69894	3	30
CYAN	4.69894	4	60
CYAN	5.32729	1	20
CYAN	5.32729	2	20
CYAN	5.32729	3	20
CYAN	5.32729	4	10
CYAN	6.8775	1	0
CYAN	6.8775	2	0
CYAN	6.8775	3	0
CYAN	6.8775	4	0
CYAN	10.5243	1	0
CYAN	10.5243	2	0
CYAN	10.5243	3	0
CYAN	10.5243	4	0
CYAN	14.2049	1	0
CYAN	14.2049	2	0
CYAN	14.2049	3	0
CYAN	14.2049	4	0

## Sheet: LC-MS Analysis (Target vs. Nom)
Chemical	Nominal Concentration (Target; ug/L)	Measured Concentration (Day 0)	Measured Concentration (Day 4)	Geomean			NOTES	ug = µg
Control	0	<LOQ	<LOQ	<LOQ			ND	Non Detect
FLUB	16	50.4	51.4	50.9			LOQ	limit of quantitation
FLUB	24	75.9	84	79.8			LOD	limit of detection
FLUB	36	88.9	82	85.4
FLUB	54	112.5	133.5	122.6			Limits of Quantification
FLUB	81	160.4	190.1	174.6		Chemical	LOQ (ug/L)
SULF	40	57.3	57.5	57.4		IMI	0.55
SULF	60	109.7	98.3	103.8		CYAN	0.33
SULF	90	160.7	164.8	162.7		FLUB	0.25
SULF	135	205.8	209.8	207.8		SULF	0.22
SULF	202.5	252.5	268.7	260.5		FLUP	0.15
FLUP	4	6.9	5.9	6.4		CHLOR	0.11
FLUP	6	8	9.4	8.7
FLUP	9	12.3	11.5	11.9
FLUP	13.5	17.5	12.8	15
FLUP	20.25	27.4	24.3	25.8
CHLOR	1	3.5	3.4	3.4
CHLOR	1.5	3.9	3.7	3.8
CHLOR	2.25	4.8	3.7	4.3
CHLOR	3.375	6.9	4.7	3.4
CHLOR	5.0625	9	5.5	5.1
IMI	4	4.9	6.7	5.72975
IMI	6	6.1	8.7	7.57799	*Note: another replicate was measured at 8.1 ug/L here
IMI	9	9.8	12.4	10.7067	*Note: another replicate was measured at 10.1 ug/L
IMI	13.5	16.1	34.7	25.8725	*Note: another replicate was measured (d 0) at 31.0 ug/L
IMI	20.25	25.7	24.1	24.8871
CYAN	4	4.6	4.8	4.69894
CYAN	6	6.6	4.3	5.32729
CYAN	9	8.6	5.5	6.8775
CYAN	13.65	14.2	7.8	10.5243
CYAN	20.25	17.7	11.4	14.2049
ACN Solvent Control	0	ND	ND	0
ACN Solvent Control	0	ND	ND	0
ACN Solvent Control	0	ND	ND	0
ACN Solvent Control	0	ND	ND	0
ACN Solvent Control	0	ND	ND	0

## Sheet: Comparative Toxicity Comparison
Chlorantraniliprole							Flupyradifurone								Sulfoxaflor
Spp	48 h L/EC50 (mg/L)	48 h L/EC50 (ug/L)		vs. 96 h C. dilutus			Spp	48 h L/EC50 (mg/L)	48 h L/EC50 (ug/L)		vs. 96 h C. dilutus				Spp	48 h L/EC50 (mg/L)	48 h L/EC50 (ug/L)		vs. 96 h C. dilutus
D.magna	0.0116	11.6		2.9			D. magna	77.6	77600	4674.7		>			D. magna	399	399000		2427.01		>
C. triangulifer	0.0116	11.6		2.9			C. riparius	0.0617	61.7	3.71687					C. dilutus	0.622	622		3.78345
C. atterima	0.0117	11.7		2.925
G. pseudolimnaeus	0.0351	35.1		8.775
H. azteca	0.389	389		97.25
S. carolinensis	0.258	258		64.5
C. riparius	0.0859	85.9		21.475
Acute HC5	median hc5 for aquatic spp = 2.9 ug a.s./ L			RAC = 0.58 ug/L (EFSA)
Cyantraniliprole
Spp	48 h L/EC50 (mg/L)	48 h L/EC50 (ug/L)		vs. 96 h C. dilutus
D. magna	0.0204	20.4		4.34043
G. pseudolimnaeus	0.172	172		36.5957
H. azteca	0.137	137		29.1489	>		Flubendamide
C. dubia	0.04	40		8.51064			Spp	48 h L/EC50 (mg/L)	48 h L/EC50 (ug/L)		vs. 96 h C. dilutus
C. triangulifer	0.0715	71.5		15.2128			D. magna		60		0.652174	>
C. riparius	0.719	719		152.979
S. carolinensis	14	14000		2978.72
L. ontario	0.0748	74.8		15.9149
Acute HC5	0.0118	11.8
RAC
